# Supplementary material
Source: PubMed Central journal article supplement (PMC317280)
Supplement: 1471-2148-3-25-S1.pdf [file 1471-2148-3-25-S1.pdf]

**Table 2 - Taxa included in the multi-species data set**

Genus designations follow the stock list of the Tucson Drosophila Species Stock Center [41] .

| Genus (subgenus)               | species                    | Code | Collection Locale             | Stock No.     | N   |
|--------------------------------|----------------------------|------|-------------------------------|---------------|-----|
| <i>Drosophila (Sophophora)</i> | <i>algonquin</i>           | ALG  | Toronto, Ontario, Canada      | –             | 64  |
| <i>Drosophila (Sophophora)</i> | <i>athabasca</i>           | ATH  | Toronto, Ontario, Canada      | –             | 76  |
| <i>Drosophila (Sophophora)</i> | <i>melanogaster</i>        | MEL  | See text                      | –             | 192 |
| <i>Drosophila (Sophophora)</i> | <i>simulans</i>            | SIM  | Toronto, Ontario, Canada      | –             | 114 |
| <i>Drosophila (Sophophora)</i> | <i>nebulosa</i>            | NEB  | San Jose, Costa Rica          | 14030-0761.1  | 97  |
| <i>Drosophila (Sophophora)</i> | <i>willistoni</i>          | WIL  | Royal Palm Pk., Florida, USA  | 14030-0811.2  | 88  |
| <i>Drosophila (Sophophora)</i> | <i>sturtevanti</i>         | STU  | Montecristi, Dominican Rep.   | 14043-0871.11 | 102 |
| <i>Drosophila (Sophophora)</i> | <i>saltans</i>             | SAL  | San Jose, Costa Rica          | 14045-0911.0  | 104 |
| <i>Drosophila (Drosophila)</i> | <i>virilis</i>             | VIR  | Pasadena, California, USA     | 15010-1051.0  | 109 |
| <i>Drosophila (Drosophila)</i> | <i>americana americana</i> | AME  | Millersburg, P.A., USA        | 15010-0951.3  | 113 |
| <i>Drosophila (Drosophila)</i> | <i>hydei</i>               | HYD  | Toronto, Ontario, Canada      | –             | 180 |
| <i>Drosophila (Drosophila)</i> | <i>repleta</i>             | REP  | Barbados                      | 15084-1611.0  | 108 |
| <i>Drosophila (Drosophila)</i> | <i>micromelanica</i>       | MIC  | Santa Rita Mts., Arizona, USA | 15030-1151.0  | 31  |
| <i>Drosophila (Drosophila)</i> | <i>robusta</i>             | ROB  | Lake Champlain, Vermont, USA  | 15020-1111.1  | 108 |
| <i>Drosophila (Drosophila)</i> | <i>falleni</i>             | FAL  | Toronto, Ontario, Canada      | –             | 95  |
| <i>Drosophila (Drosophila)</i> | <i>guttifera</i>           | GUT  | Austin, Texas, USA            | 15130-1971.0  | 103 |
| <i>Drosophila (Drosophila)</i> | <i>immigrans</i>           | IMM  | Tofino, B.C., Canada          | –             | 101 |
| <i>Drosophila (Drosophila)</i> | <i>sulfigaster</i>         | SUL  | Kuala Lumpur, Malaysia        | 15112-1811.0  | 109 |
| <i>Drosophila (Dorsilopha)</i> | <i>busckii</i>             | BUS  | Tofino, B.C., Canada          | –             | 101 |
| <i>Hirtodrosophila</i>         | <i>pictiventris</i>        | PIC  | Great Inagua Is., Bahamas     | 12000-0072.0  | 113 |
| <i>Zaprionus</i>               | <i>inermis</i>             | ZIN  | Koutaba, Cameroun             | 50000-2746.0  | 12  |
| <i>Zaprionus</i>               | <i>sepsoides</i>           | ZSE  | unknown                       | 50000-2744.0  | 21  |
| <i>Chymomyza</i>               | <i>procnemis</i>           | CPR  | Oahu, Hawaii, USA             | 20000-2631.1  | 106 |
| <i>Scaptodrosophila</i>        | <i>stonei</i>              | STO  | Tehran, Iran                  | 11010-0041.0  | 44  |

|                         |                                        |     |                 |              |    |
|-------------------------|----------------------------------------|-----|-----------------|--------------|----|
| <i>Scaptodrosophila</i> | <i>lebanonensis</i><br><i>casteeli</i> | LEB | Veyo, Utah, USA | 11010-0011.0 | 98 |
|-------------------------|----------------------------------------|-----|-----------------|--------------|----|
